# Supplementary material for: Evaluation of Absolute Lymphocyte Count at Diagnosis and Mortality Among Patients With Localized Bone or Soft Tissue Sarcoma
Source: PubMed Central journal article supplement (PMC7936255; doi:10.1001/jamanetworkopen.2021.0845), 2021-03-05
Supplement: jamanetwopen-e210845-s001.pdf [file jamanetwopen-e210845-s001.pdf]

## Supplementary Online Content

Brewster R, Purington N, Henry S, Wood D, Ganjoo K, Bui N. Evaluation of absolute lymphocyte count at diagnosis and mortality among patients with localized bone or soft tissue sarcoma. *JAMA Netw Open*. 2021;4(3):e210845. doi:10.1001/jamanetworkopen.2021.0845

**eTable 1.** Multivariate Cox Regression Analysis of the Association Between Minimum ALC and Overall Survival

**eTable 2.** Multivariate Cox Regression Analysis of the Association Between Minimum ALC, Stratified by Lymphopenia Grade, and Overall Survival

This supplementary material has been provided by the authors to give readers additional information about their work.

**eTable 1.** Multivariate Cox Regression Analysis of the Association Between Minimum ALC and Overall Survival

| Lab Value                     | Patients (n) | Hazard Ratio (95% CI) | P Value          |
|-------------------------------|--------------|-----------------------|------------------|
| Minimum WBC                   |              |                       |                  |
| Low                           | 78           | 0.61 (0.33-1.12)      | 0.11             |
| Normal (>4 K/uL, <11 K/uL)    | 527          | 1                     |                  |
| High                          | 29           | 1.20 (0.65-2.21)      | 0.55             |
| Minimum ANC                   |              |                       |                  |
| Low                           | 78           | 0.58 (0.20-1.68)      | 0.32             |
| Normal (>1.7 K/uL, <6.7 K/uL) | 527          | 1                     |                  |
| High                          | 29           | 1.29 (0.90-1.86)      | 0.16             |
| Minimum ALC                   |              |                       |                  |
| Low                           | 281          | 1.82 (1.39-2.40)      | <b>&lt;0.001</b> |
| Normal (>1 K/uL, <3 K/uL)     | 335          | 1                     |                  |
| High                          | 18           | 1.19 (0.52-2.74)      | 0.16             |
| Tumor Grade*                  |              |                       |                  |
| 1                             | 88           | 1                     |                  |
| 2                             | 81           | 0.97 (0.47-1.98)      | 0.93             |
| 3                             | 85           | 3.82 (2.13-6.85)      | <b>&lt;0.001</b> |
| 4                             | 163          | 3.38 (1.96-5.85)      | <b>&lt;0.001</b> |
| Age at Diagnosis              |              | 1.02 (1.01-1.02)      | <b>&lt;0.001</b> |

**eTable 2.** Multivariate Cox Regression Analysis of the Association Between Minimum ALC, Stratified by Lymphopenia Grade, and Overall Survival

| Lab Value                           | Patients (n) | Hazard Ratio (95% CI) | P Value          |
|-------------------------------------|--------------|-----------------------|------------------|
| Minimum WBC                         |              |                       |                  |
| Low                                 | 78           | 0.56 (0.30-1.04)      | 0.11             |
| Normal (>4 K/uL, <11 K/uL)          | 527          | 1                     |                  |
| High                                | 29           | 1.20 (0.65-2.21)      | 0.55             |
| Minimum ANC                         |              |                       |                  |
| Low                                 | 78           | 0.56 (0.19-1.61)      | 0.32             |
| Normal (>1 K/uL, <3 K/uL)           | 527          | 1                     |                  |
| High                                | 29           | 1.30 (0.90-1.87)      | 0.16             |
| Minimum ALC                         |              |                       |                  |
| Low, Grade 1/2 (>0.5 K/uL, ≤1 K/uL) | 181          | 1.60 (1.18-2.18)      | <b>0.002</b>     |
| Low, Grade 3/4 (≤0.5 K/uL)          | 100          | 2.44 (1.68-3.55)      | <b>&lt;0.001</b> |
| Normal (>1 K/uL, <3 K/uL)           | 335          | 1                     |                  |
| High                                | 18           | 1.20 (0.52-2.75)      | 0.16             |
| Tumor Grade*                        |              |                       |                  |
| 1                                   | 88           | 1                     |                  |
| 2                                   | 81           | 1.02 (0.50-2.11)      | 0.93             |
| 3                                   | 85           | 3.99 (2.22-7.16)      | <b>&lt;0.001</b> |
| 4                                   | 163          | 3.45 (2.00-5.96)      | <b>&lt;0.001</b> |
| Age at Diagnosis                    |              | 1.02 (1.01-1.02)      | <b>&lt;0.001</b> |
